# Supplementary material
Source: PubMed Central journal article supplement (PMC3989617)
Supplement: embj0033-0229-sd4.pdf [file embj0033-0229-sd4.pdf]

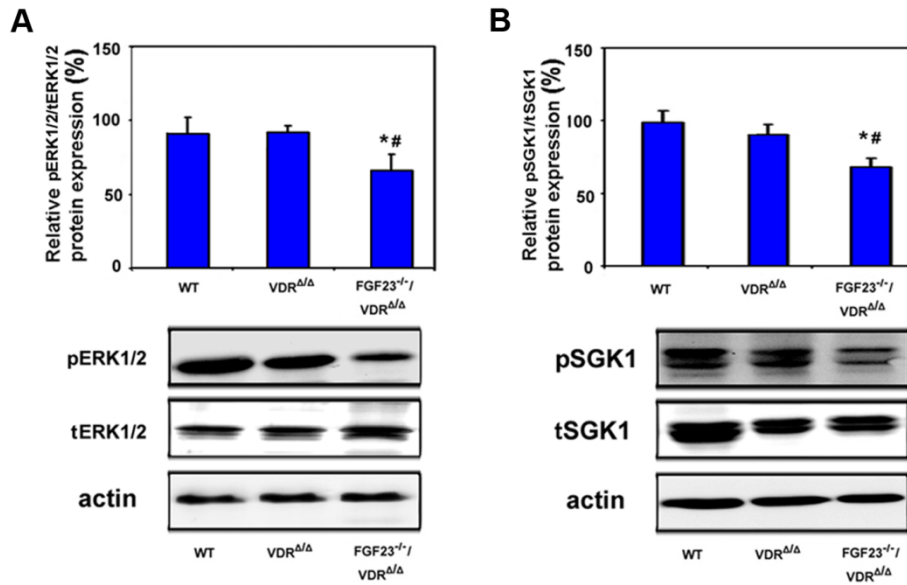

Supplemental Figure 4, Andrukhova et al.

**Figure S4. ERK1/2 and SGK1 phosphorylation is decreased in *Fgf23* deficient mice.** (A) Western blot analysis of phosphorylated ERK1/2 and (B) phosphorylated SGK1 in homogenized renal cortex samples of 9-month-old WT, VDR<sup>Δ/Δ</sup> and *Fgf23*<sup>-/-</sup>/VDR<sup>Δ/Δ</sup> mice. Data represent mean ± SEM of 6 – 8 animals each. \* denotes P < 0.05 vs. WT, # P < 0.05 vs. VDR<sup>Δ/Δ</sup> mice.
