# Supplementary material
Source: PubMed Central journal article supplement (PMC3989617)
Supplement: embj0033-0229-sd5.pdf [file embj0033-0229-sd5.pdf]

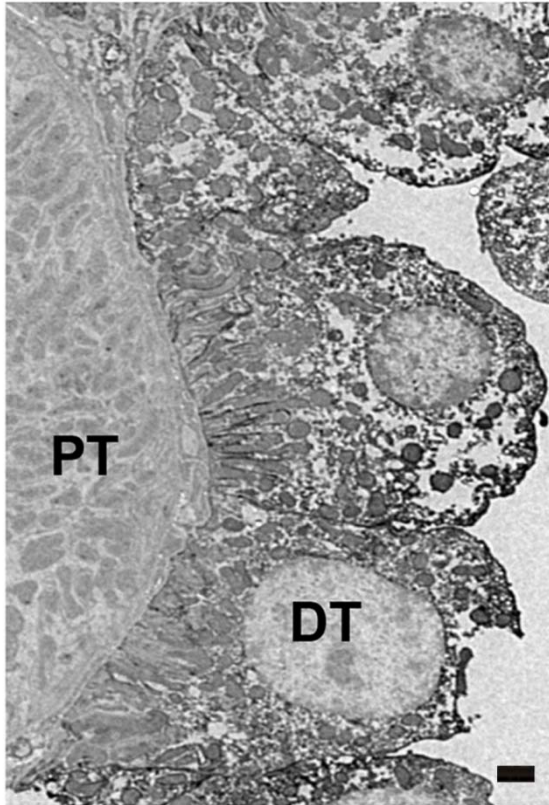

Supplemental Figure 5, Andrukhova et al.

**Figure S5. Anti-TRPV5 antibody stains exclusively renal distal tubular cells.** Overview of immuno-electron microscopic staining using an anti-TRPV5 antibody, and DAB for detection of bound antibody. DAB staining (black) is found exclusively in distal tubular cells. PT = proximal tubular cell, DT = distal tubular cell. Bar = 500 nm.
