# Supplementary material
Source: PubMed Central journal article supplement (PMC3989617)
Supplement: embj0033-0229-sd6.pdf [file embj0033-0229-sd6.pdf]

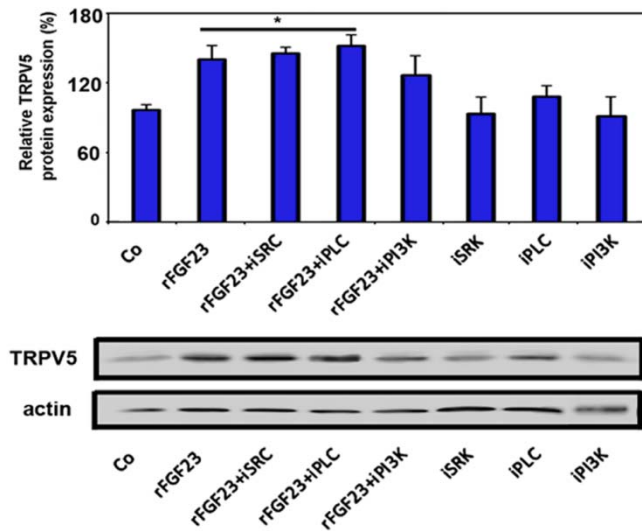

Supplemental Figure 6, Andrukhova et al.

**Figure S6. FGF23-induced increase in TRPV5 protein abundance in isolated distal tubular segments is independent of SRC and PLC signaling.** Complex glycosylated TRPV5 protein expression in isolated distal tubular segments treated *in vitro* with rFGF23 alone or in combination with specific inhibitors of Src kinase (iSRC), phospholipase C (PLC), or phosphatidylinositol 3-kinase (iPI3K). Data represent mean  $\pm$  SEM of 3 – 4 individual samples. \* denotes  $P < 0.05$  vs. vehicle control (Co).
