# Supplementary material
Source: PubMed Central journal article supplement (PMC3989617)

Figure 2.

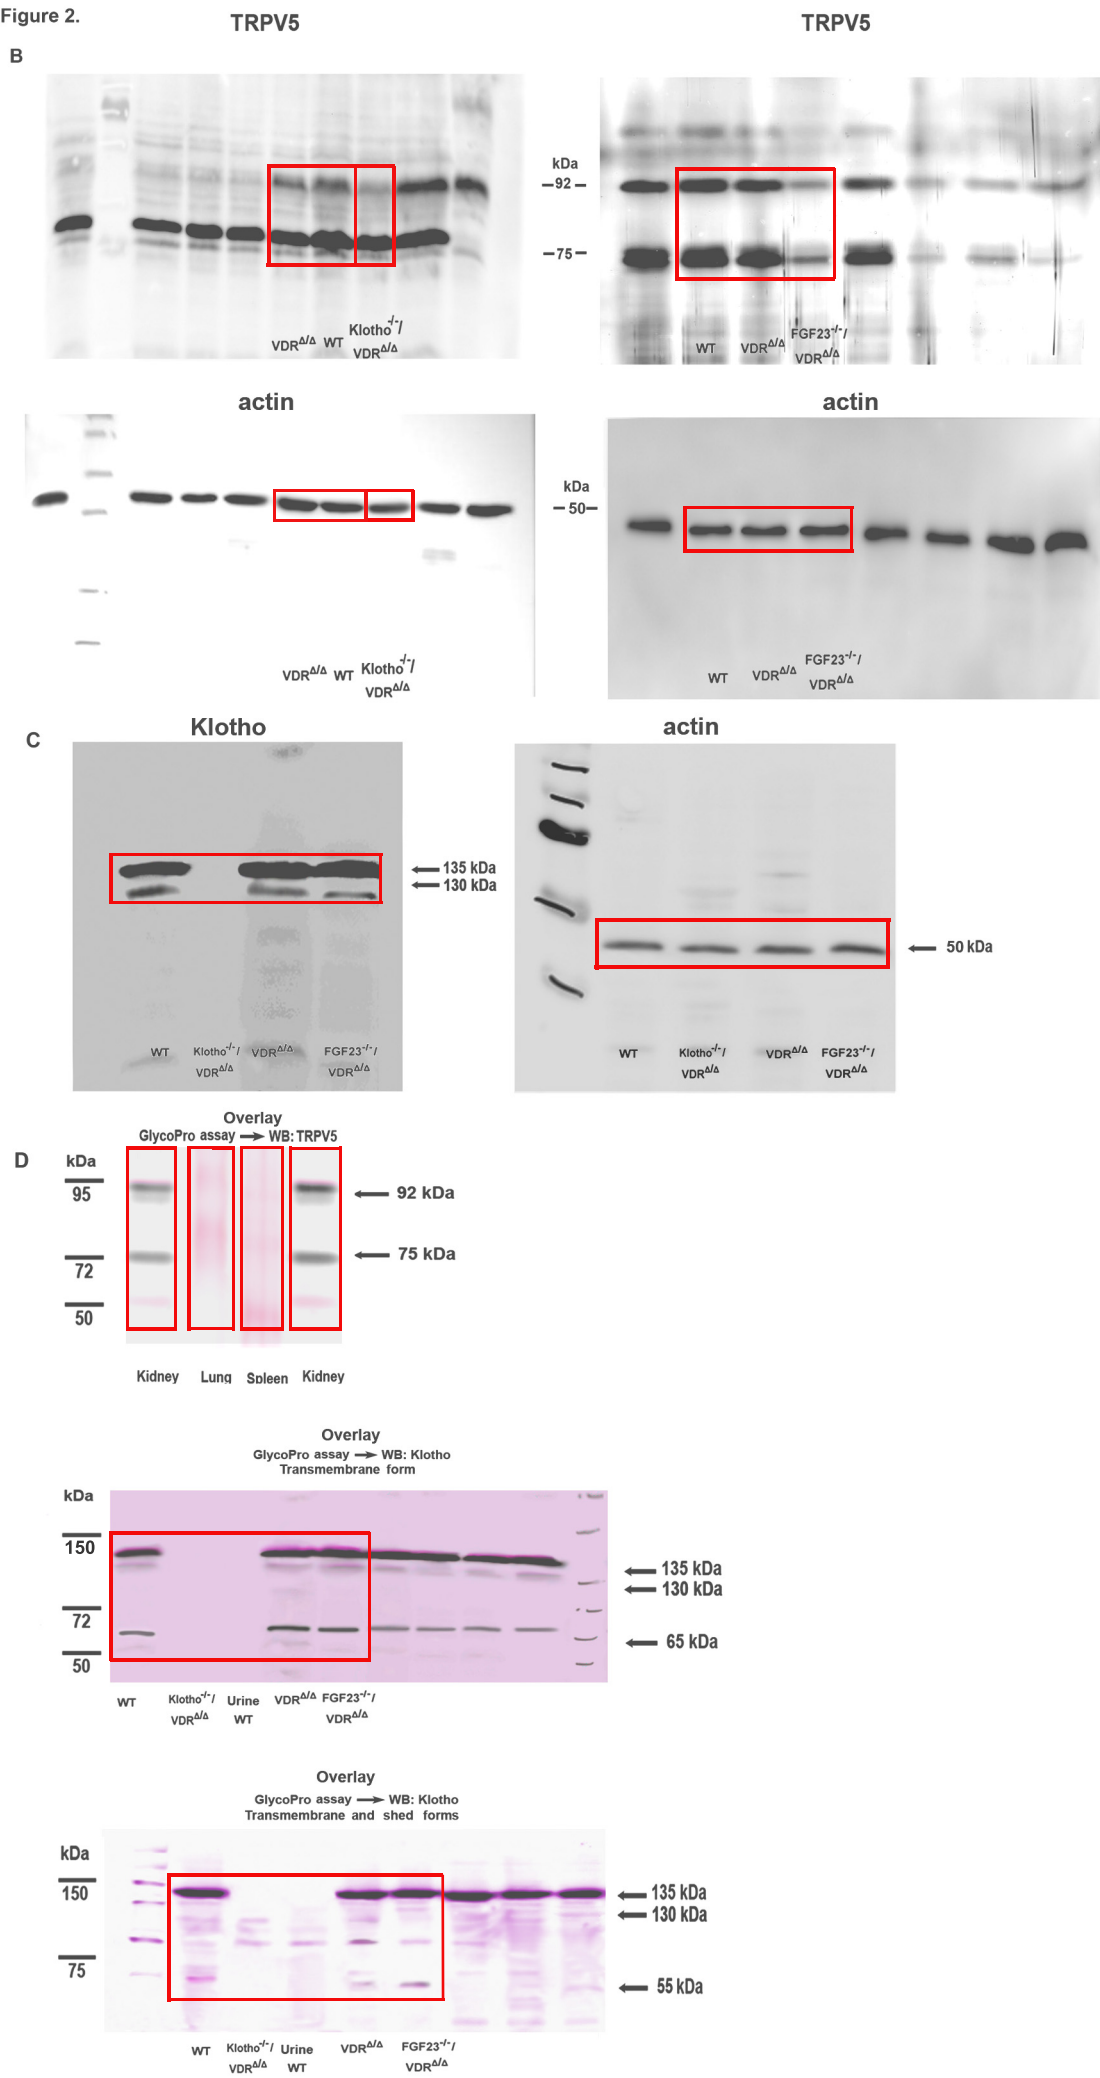

Supplement: embj0033-0229-sd13.pdf [file embj0033-0229-sd13.pdf]
