# Supplementary material
Source: PubMed Central journal article supplement (PMC3989617)

Figure 4.

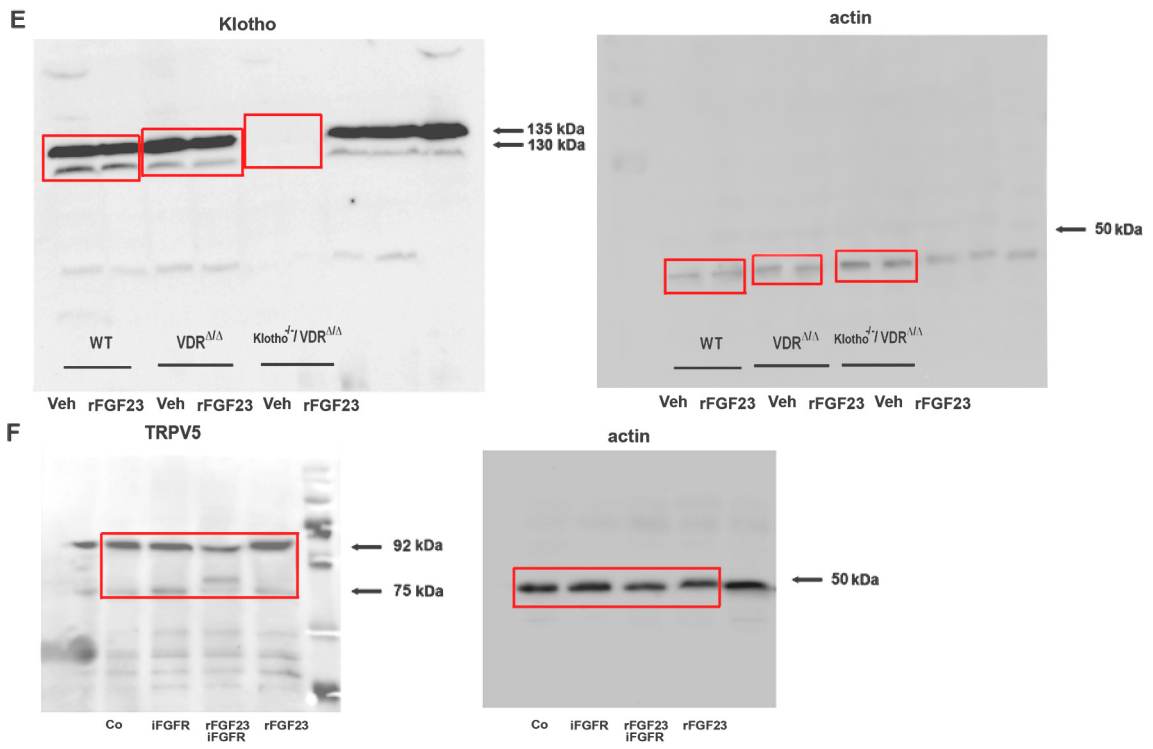

Supplement: embj0033-0229-sd14.pdf [file embj0033-0229-sd14.pdf]
