# Supplementary material
Source: PubMed Central journal article supplement (PMC3989617)

Figure 5

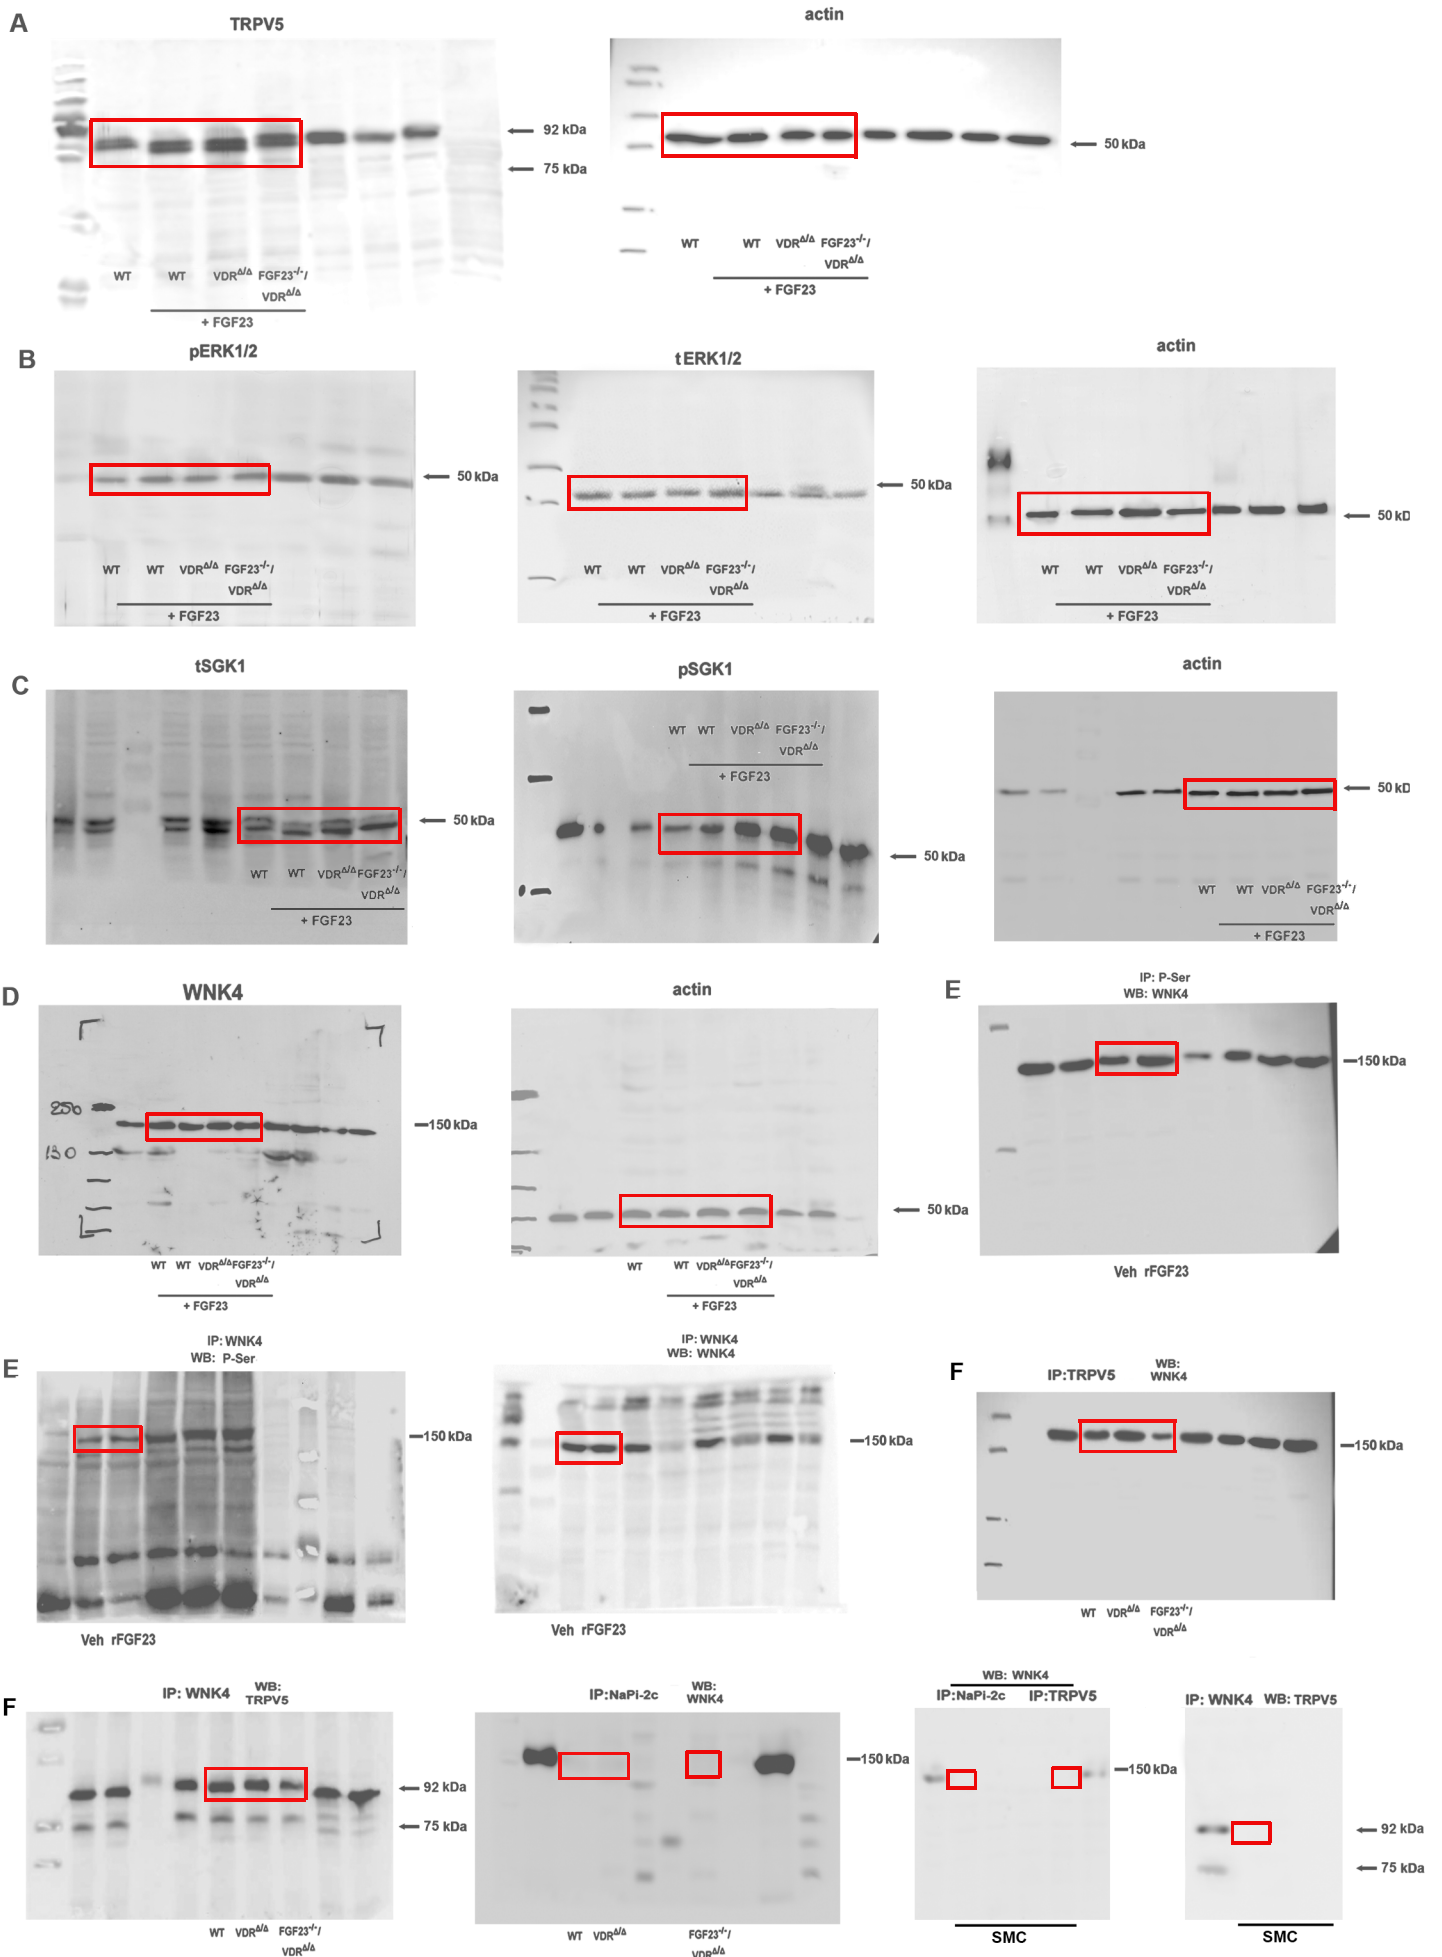

Supplement: embj0033-0229-sd15.pdf [file embj0033-0229-sd15.pdf]
