# Supplementary material
Source: PubMed Central journal article supplement (PMC3989617)

Figure 7.

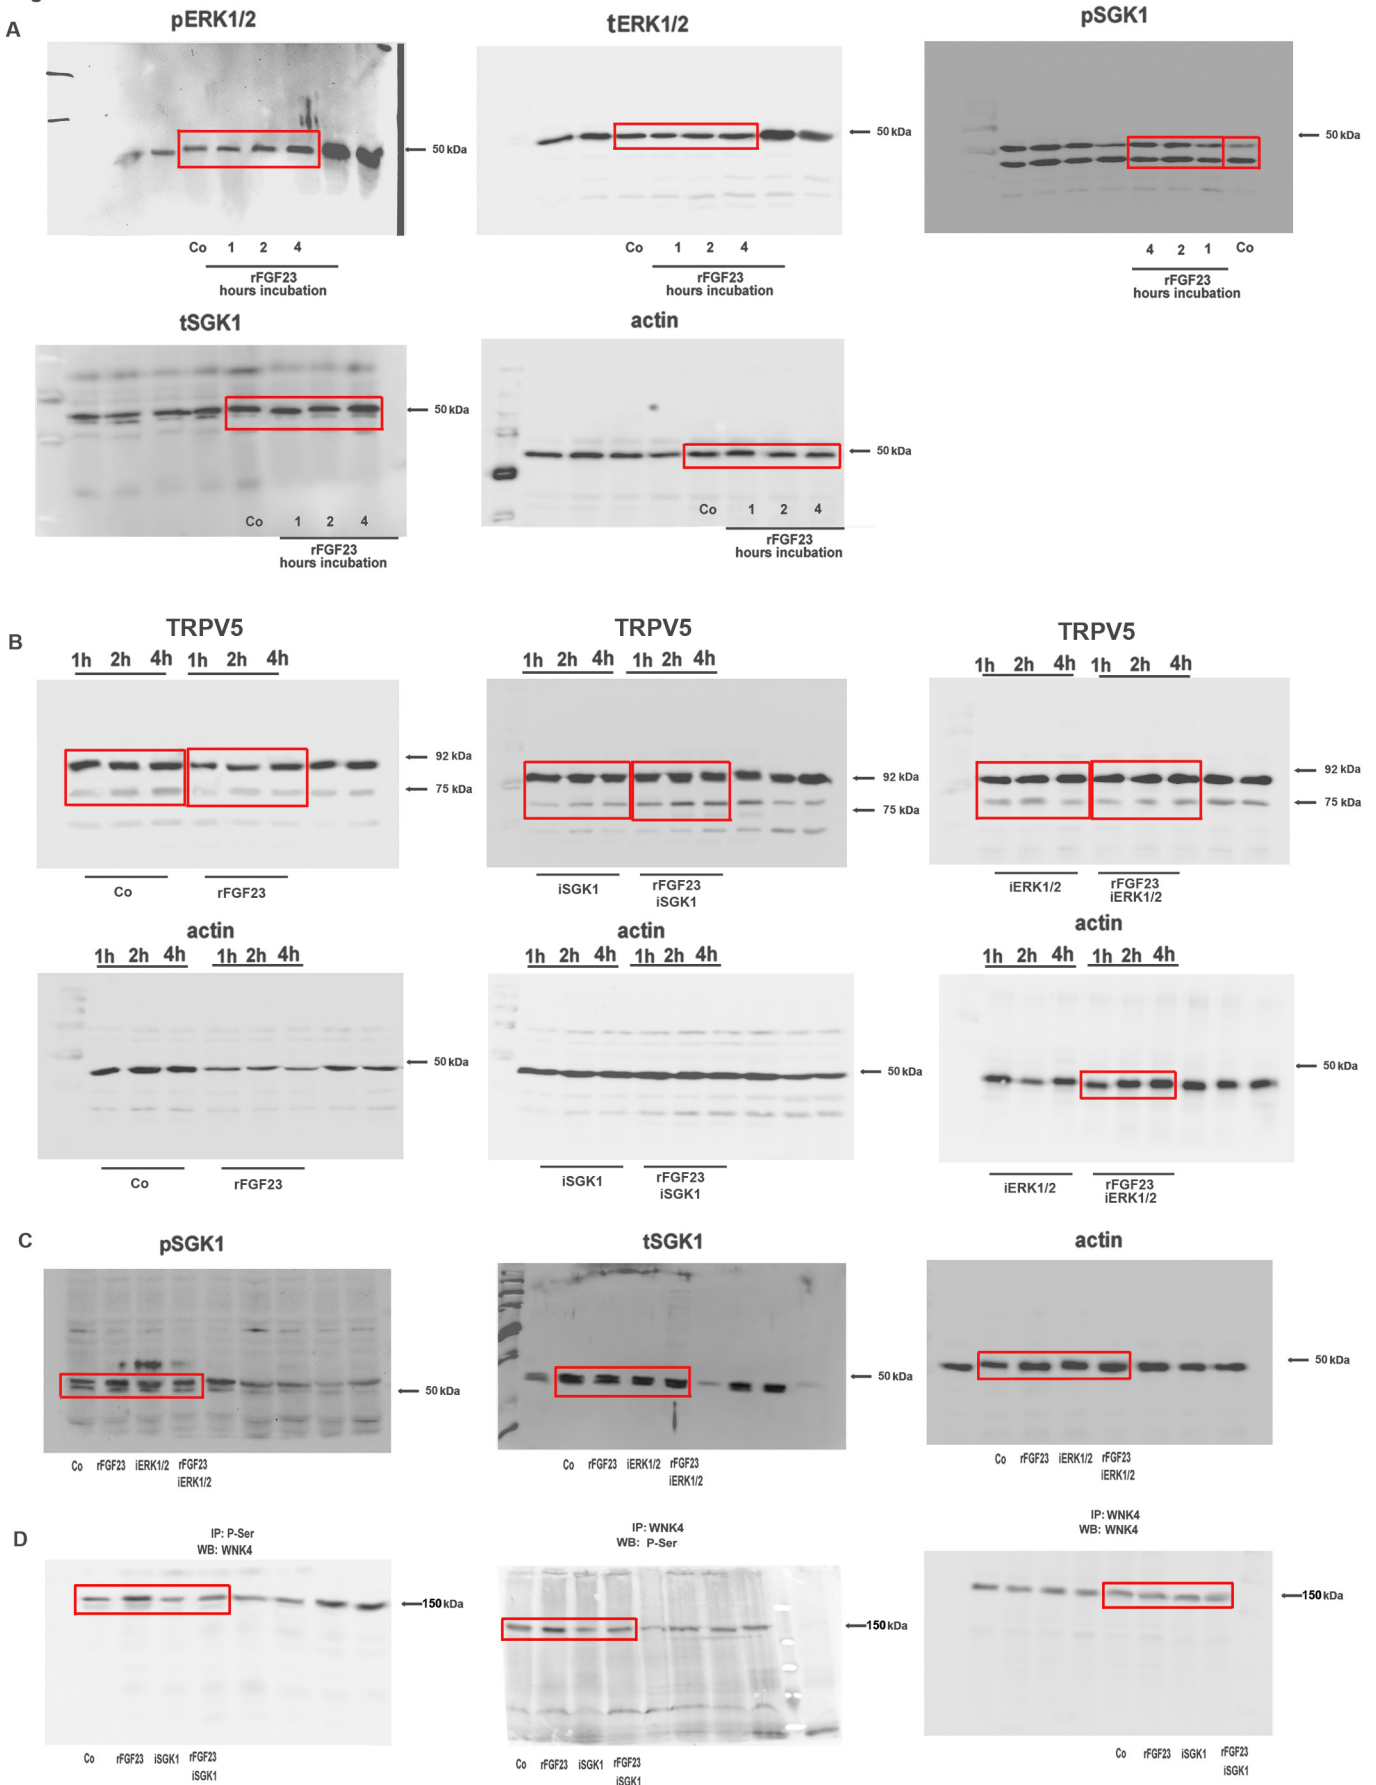

Supplement: embj0033-0229-sd16.pdf [file embj0033-0229-sd16.pdf]
