# Supplementary material
Source: PubMed Central journal article supplement (PMC3989617)

Figure 8.

A

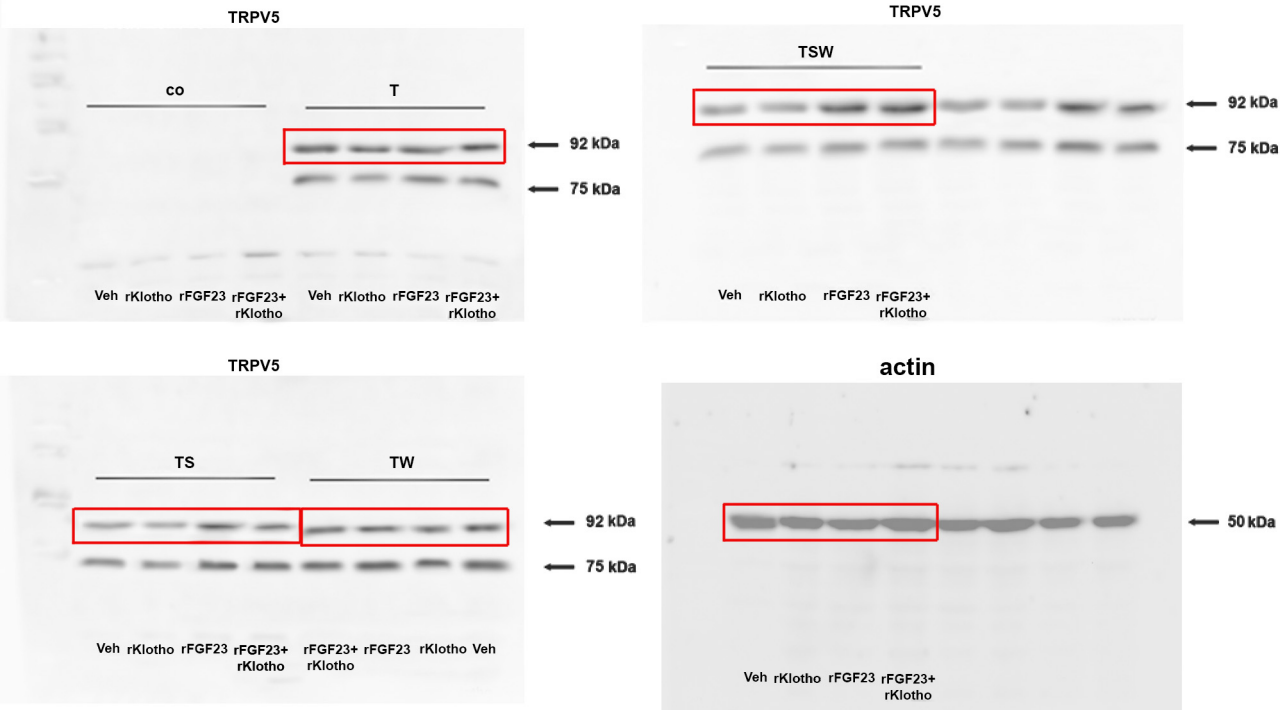

Supplement: embj0033-0229-sd17.pdf [file embj0033-0229-sd17.pdf]
